# Supplementary material for: Bioactive Glyceroglycolipids from Marine Macroalgae: Isolation, Purification, and Potential Applications
Source: Research Square preprint supplement (doi:10.21203/rs.3.rs-6538959/v1), 2025-05-06
Supplement: Supplementary file 1 [file 775baad95810a4b231ae6bc0.docx]

**Table S1** Factors and levels in single-factor experiments

| Levels | Factors | | | |
| --- | --- | --- | --- | --- |
| Liquid-solid ratio (mL/g) | Extraction temperature (℃) | Methanol volume ratio (%) | Extraction time (h) |
| 1 | 15 | 35 | 50 | 1 |
| 2 | 20 | 45 | 60 | 1.5 |
| 3 | 25 | 55 | 70 | 2 |
| 4 | 30 | 65 | 80 | 2.5 |
| 5 | 35 | 75 | 90 | 3 |

**Table S2** Factors and levels in response surface experiments

| Macroalgae | Levels | Factors | | | |
| --- | --- | --- | --- | --- | --- |
| Liquid-solid ratio (mL/g) | Extraction temperature (℃) | Methanol volume ratio (%) | Extraction time (h) |
| *P. palmata* | -1 | 20 | 55 | 60 | 2 |
| 0 | 25 | 65 | 70 | 2.5 |
| 1 | 30 | 75 | 80 | 3 |
| *C. filum* | -1 | 20 | 45 | 70 | 2 |
| 0 | 25 | 55 | 80 | 2.5 |
| 1 | 30 | 65 | 90 | 3 |
| *E. clathrata* | -1 | 15 | 55 | 70 | 1.5 |
| 0 | 20 | 65 | 80 | 2 |
| 1 | 25 | 75 | 90 | 2.5 |

**Table S3** Box-Behnken experimental design and resultsof glyceroglycolipids extraction from *Chorda filum*

| Run | A (Liquid-solid ratio) | B (Extraction temperature) | C (Methanol ratio) | D (Extraction time) | Glyceroglycolipids yield (mg/g) |
| --- | --- | --- | --- | --- | --- |
| 1 | -1 | -1 | 0 | 0 | 42.47 |
| 2 | 1 | -1 | 0 | 0 | 51.14 |
| 3 | -1 | 1 | 0 | 0 | 57.41 |
| 4 | 1 | 1 | 0 | 0 | 54.96 |
| 5 | 0 | 0 | -1 | -1 | 39.38 |
| 6 | 0 | 0 | -1 | 1 | 42.82 |
| 7 | 0 | 0 | 1 | -1 | 53.48 |
| 8 | 0 | 0 | 1 | 1 | 52.11 |
| 9 | -1 | 0 | -1 | 0 | 41.88 |
| 10 | 1 | 0 | -1 | 0 | 42.72 |
| 11 | -1 | 0 | 1 | 0 | 49.87 |
| 12 | 1 | 0 | 1 | 0 | 54.23 |
| 13 | 0 | -1 | 0 | -1 | 42.72 |
| 14 | 0 | 1 | 0 | -1 | 54.73 |
| 15 | 0 | -1 | 0 | 1 | 46.47 |
| 16 | 0 | 1 | 0 | 1 | 51.46 |
| 17 | -1 | 0 | 0 | -1 | 45.24 |
| 18 | 1 | 0 | 0 | -1 | 46.81 |
| 19 | -1 | 0 | 0 | 1 | 50.47 |
| 20 | 1 | 0 | 0 | 1 | 51.73 |
| 21 | 0 | -1 | -1 | 0 | 39.72 |
| 22 | 0 | 1 | -1 | 0 | 42.14 |
| 23 | 0 | -1 | 1 | 0 | 47.45 |
| 24 | 0 | 1 | 1 | 0 | 57.45 |
| 25 | 0 | 0 | 0 | 0 | 62.14 |
| 26 | 0 | 0 | 0 | 0 | 63.21 |
| 27 | 0 | 0 | 0 | 0 | 62.64 |
| 28 | 0 | 0 | 0 | 0 | 64.42 |
| 29 | 0 | 0 | 0 | 0 | 64.91 |

**Table S4** Significance tests and analysis of variance for the regression model of glyceroglycolipids extraction from *C. filum*

| **Source** | **Sum of Squares** | **df** | **Mean Square** | **F-value** | **p-value** |
| --- | --- | --- | --- | --- | --- |
| **Model** | 1659.772 | 14 | 118.56 | 42.32 | <0.0001** |
| A-Liquid-solid ratio | 16.92188 | 1 | 16.92 | 6.04 | 0.0276* |
| B-Extraction temperature | 193.4427 | 1 | 193.44 | 69.06 | <0.0001** |
| C- Methanol ratio | 13.44083 | 1 | 13.44 | 4.80 | 0.0459* |
| D-Extraction time | 362.2304 | 1 | 362.23 | 129.31 | <0.0001** |
| AB | 30.9136 | 1 | 30.91 | 11.04 | 0.0050** |
| AC | 0.024025 | 1 | 0.024 | 0.008576 | 0.9275 |
| AD | 3.0976 | 1 | 3.10 | 1.11 | 0.3108 |
| BC | 12.3201 | 1 | 12.32 | 4.40 | 0.0546 |
| BD | 14.3641 | 1 | 14.36 | 5.13 | 0.0399* |
| CD | 5.784025 | 1 | 5.78 | 2.06 | 0.1727 |
| A² | 265.818 | 1 | 265.82 | 94.89 | <0.0001** |
| B² | 274.293 | 1 | 274.29 | 97.92 | <0.0001** |
| C² | 398.7297 | 1 | 398.73 | 142.34 | <0.0001** |
| D² | 599.2381 | 1 | 599.24 | 213.92 | <0.0001** |
| **Residual** | 39.21781 | 14 | 2.80 |  |  |
| Lack of Fit | 33.71649 | 10 | 3.37 | 2.45 | 0.2009 |
| Pure Error | 5.50132 | 4 | 1.38 |  |  |
| **Cor Total** | 1698.99 | 28 |  |  |  |

**Table S5** Box-Behnken experimental design and resultsof glyceroglycolipids extraction from *E. clathrata*

| Run | A (Liquid-solid ratio) | B (Extraction temperature) | C (Methanol ratio) | D (Extraction time) | Glyceroglycolipids yield (mg/g) |
| --- | --- | --- | --- | --- | --- |
| 1 | -1 | -1 | 0 | 0 | 78.71 |
| 2 | 1 | -1 | 0 | 0 | 74.57 |
| 3 | -1 | 1 | 0 | 0 | 75.92 |
| 4 | 1 | 1 | 0 | 0 | 84.74 |
| 5 | 0 | 0 | -1 | -1 | 74.44 |
| 6 | 0 | 0 | -1 | 1 | 81.61 |
| 7 | 0 | 0 | 1 | -1 | 80.91 |
| 8 | 0 | 0 | 1 | 1 | 81.24 |
| 9 | -1 | 0 | -1 | 0 | 72.29 |
| 10 | 1 | 0 | -1 | 0 | 81.14 |
| 11 | -1 | 0 | 1 | 0 | 83.09 |
| 12 | 1 | 0 | 1 | 0 | 78.19 |
| 13 | 0 | -1 | 0 | -1 | 78.53 |
| 14 | 0 | 1 | 0 | -1 | 81.16 |
| 15 | 0 | -1 | 0 | 1 | 81.17 |
| 16 | 0 | 1 | 0 | 1 | 81.28 |
| 17 | -1 | 0 | 0 | -1 | 75.3 |
| 18 | 1 | 0 | 0 | -1 | 79.45 |
| 19 | -1 | 0 | 0 | 1 | 76.56 |
| 20 | 1 | 0 | 0 | 1 | 79.93 |
| 21 | 0 | -1 | -1 | 0 | 76.9 |
| 22 | 0 | 1 | -1 | 0 | 80.5 |
| 23 | 0 | -1 | 1 | 0 | 82.37 |
| 24 | 0 | 1 | 1 | 0 | 79.25 |
| 25 | 0 | 0 | 0 | 0 | 86.1 |
| 26 | 0 | 0 | 0 | 0 | 84.85 |
| 27 | 0 | 0 | 0 | 0 | 85.62 |
| 28 | 0 | 0 | 0 | 0 | 86.45 |
| 29 | 0 | 0 | 0 | 0 | 86.4 |

**Table S6** Significance tests and analysis of variance for the regression model of glyceroglycolipids extraction from *E. clathrata*

| **Source** | **Sum of Squares** | **df** | **Mean Square** | **F-value** | **p-value** |
| --- | --- | --- | --- | --- | --- |
| **Model** | 389.78 | 14 | 27.84 | 20.52 | <0.0001** |
| A-Liquid-solid ratio | 21.74 | 1 | 21.74 | 16.02 | 0.0013** |
| B-Extraction temperature | 9.36 | 1 | 9.36 | 6.90 | 0.0199* |
| C- Methanol ratio | 12.00 | 1 | 12.00 | 8.85 | 0.0101* |
| D-Extraction time | 27.51 | 1 | 27.51 | 20.28 | 0.0005** |
| AB | 41.99 | 1 | 41.99 | 30.96 | <0.0001** |
| AC | 0.15 | 1 | 0.15 | 0.11 | 0.7427 |
| AD | 47.27 | 1 | 47.27 | 34.84 | <0.0001** |
| BC | 1.59 | 1 | 1.59 | 1.17 | 0.2976 |
| BD | 11.29 | 1 | 11.29 | 8.32 | 0.0120* |
| CD | 11.70 | 1 | 11.70 | 8.62 | 0.0108* |
| A² | 136.73 | 1 | 136.73 | 100.80 | <0.0001** |
| B² | 46.93 | 1 | 46.93 | 34.60 | <0.0001** |
| C² | 63.54 | 1 | 63.54 | 46.84 | <0.0001** |
| D² | 61.78 | 1 | 61.78 | 45.54 | <0.0001** |
| **Residual** | 18.99 | 14 | 1.36 |  |  |
| Lack of Fit | 17.22 | 10 | 1.72 | 3.89 | 0.1014 |
| Pure Error | 1.77 | 4 | 0.44 |  |  |
| **Cor Total** | 408.77 | 28 |  |  |  |
